# Essential Titles in Neuropsychiatry

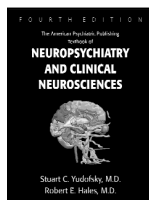

## The American Psychiatric Publishing Textbook of Neuropsychiatry and Clinical Neurosciences, Fourth Edition

Edited by **Stuart C. Yudofsky, M.D.**, and **Robert E. Hales, M.D., M.B.A.**

The fourth edition of this tremendously successful volume expands its focus on the neurosciences and covers topics such as the epidemiology and genetics of neuropsychiatric disorders, the neuropsychiatric aspects of delirium, the growth in clinical knowledge and clinical relevance of drug-induced delirium and encephalopathies other than delirium, and educational and certification issues in neuropsychiatry.

2002 • 1398 pages • ISBN 978-1-58562-004-3 • Hardcover  
\$264.00 • Item #62004

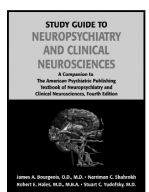

## Study Guide to Neuropsychiatry and Clinical Neurosciences

A Companion to The American Psychiatric Publishing Textbook of Neuropsychiatry and Clinical Neurosciences, Fourth Edition

**James A. Bourgeois, O.D., M.D.**, **Narriman C. Shahrokh, Robert E. Hales, M.D., M.B.A.**, and **Stuart C. Yudofsky, M.D.**

The *Study Guide* is made up of 259 questions divided into 39 individual quizzes of 5-10 questions each that correspond to chapters in *The American Psychiatric Publishing Textbook of Neuropsychiatry and Clinical Neurosciences, Fourth Edition*. Questions are followed by an Answer Guide that references relevant text (including the page number) in the *Textbook* to allow quick access to needed information. Each answer is accompanied by a discussion that addresses the correct response and also explains why other responses are not correct.

2006 • 200 pages • ISBN 978-1-58562-259-7 • Paperback  
\$37.95 • Item #62259

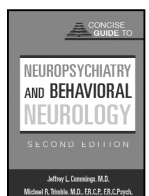

## Concise Guide to Neuropsychiatry and Behavioral Neurology, Second Edition

**Jeffrey L. Cummings, M.D.**, and **Michael R. Trimble, M.D., F.R.C.P., F.R.C.Psych.**

This popular pocket guide presents brief synopses of the major neuropsychiatric and neurobehavioral syndromes, discusses their clinical assessment, and provides guidelines for management, plus a glossary, index, and bibliographies that refer to more extensive reading.

2002 • 304 pages • ISBN 978-1-58562-078-4 • Paperback  
\$34.95 • Item #62078

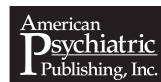

To order Call: **1-800-368-5777** or  
Visit our website: **www.appi.org**

Please reference priority code AH717 when ordering.

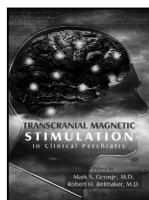

## Transcranial Magnetic Stimulation in Clinical Psychiatry

Edited by **Mark S. George, M.D.**, and **Robert H. Belmaker, M.D.**

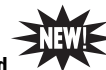

This book describes a new technology that allows physicians to focally stimulate the brain in awake adults through a non-invasive procedure.

*Transcranial Magnetic Stimulation in Clinical Psychiatry* is an accessible and authoritative review of TMS, a procedure that is showing promise as a treatment in several disorders. Its authors explain how the procedure works, then the latest findings in a wide range of situations—notably in depression, but also in other conditions ranging from migraine to stroke recovery.

This concise overview of TMS offers practical guidance for psychiatrists and other clinicians using it as a therapy, or referring their patients to have this done, as well as updating the field for neuroscientists and neurologists. It begins with background on the physics and safety of TMS, a guide for administering the procedure, and a review of basic neurophysiological studies with TMS, showing how it can be used to measure connectivity and excitability of the cerebral cortex. The heart of book is then devoted to its clinical applications, organized by disorders.

2007 • 289 pages • ISBN 978-1-58562-197-2 • Paperback  
\$55.00 • Item #62197

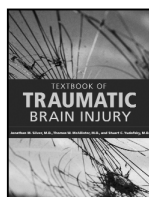

## Textbook of Traumatic Brain Injury

Edited by **Jonathan M. Silver, M.D.**, **Thomas W. McAllister, M.D.**, and **Stuart C. Yudofsky, M.D.**

Extensively updated and expanded by recognized experts, this comprehensive textbook contains 40 chapters, including 15 new for this edition, and more than 100 informative figures and illustrations. New chapters address structural and functional imaging, electrophysiologic techniques, neuropsychological assessment, social issues, systems of care, and treatment modalities, including alternative therapies. Expanded chapters discuss the multiple neuropsychiatric sequelae but not encompassed by the usual psychiatric syndromes, including apathy, reduced awareness of deficits, fatigue, pain, headaches, balance problems, visual difficulties, and sports injuries.

2005 • 792 pages • ISBN 978-1-58562-105-7 • Hardcover  
\$115.00 • Item #62105

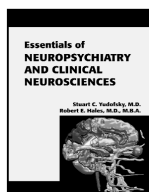

## Essentials of Neuropsychiatry and Clinical Neurosciences

Edited by **Stuart C. Yudofsky, M.D.**, and **Robert E. Hales, M.D., M.B.A.**

This book functions as a subspecialty reference that details assessment techniques and the full range of treatments available for patients with neuropsychiatric disorders.

2004 • 770 pages • ISBN 978-1-58562-005-0 • Paperback  
\$84.00 • Item #62005

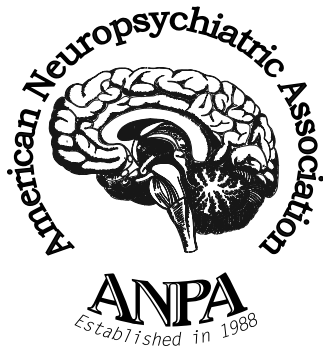

19th Annual Meeting

**American Neuropsychiatric Association**

**March 1 - 4, 2008**

**Marriott Savannah Riverfront**

Jointly Sponsored by:

The Ohio State University Medical Center

American Neuropsychiatric Association

With special participation of the International Neuropsychological Society  
and the Society for Behavioral and Cognitive Neurology

## Call for Abstracts

We are pleased to announce the 19th Annual Meeting of the American Neuropsychiatric Association to be held in Savannah, Georgia at the Marriott Savannah Riverfront, March 1 - 4, 2008. This year's meeting will include a Keynote Address and several scientific sessions, each with several prominent speakers. The meeting will also include a Poster Session with concurrent Hot Topics Platform Presentations, offering an opportunity to present new research and to discuss the work of others. We invite you to submit an abstract of your research to be presented during this session.

Travel awards will be given to several of the young investigators who are embarking on promising careers in the clinical neurosciences. The ANPA Scientific Program Committee will review all abstracts, and decisions regarding acceptance will be e-mailed at the end of November.

On-line abstract submission will be available beginning May 1, 2007. The absolute deadline for the receipt of abstracts is October 22, 2007. Abstracts accepted and presented at the meeting will be published in the spring 2008 issue of the *Journal of Neuropsychiatry and Clinical Neurosciences*, the official journal of ANPA. **Please note that by submitting an abstract, the investigator agrees to attend the meeting and present the poster or to designate an alternate presenter who will attend the meeting.**

**Instructions for on-line abstract submission will be on the ANPA web site: [www.anpaonline.org](http://www.anpaonline.org)**

### Abstract Submission Instructions

#### Abstracts must:

- Adhere to the format in order to be considered.
- Have relevance for neuropsychiatry, behavioral/cognitive neurology, or the clinical neurosciences.
- Represent work not previously published or presented.
- Be 250 words or fewer (not including title, authors, and affiliations).
- Be clearly and concisely written and contain sufficient information to allow the review committee to assess the research being presented.
- Include affiliation for principal or first author only.
- List the e-mail address in the submission that can be used for all communication.
- Be sure to list all authors in the abstract.
- Include a list of all external sources of support and possible conflicts of interest.

#### Format:

- Please type your title as follows: The First Letter of Each Word is Capitalized, Except for the First Letter of Each Preposition or Conjunction.
- Scientific words can be entered in mixed case (e.g. fMRI).
- Tables, photographs, figures, or references may not be included.
- All submissions must be in a Word or text document.

**In addition, strict adherence to the formatting listed below for either Original Work or a Case Report is required. Abstracts that do not follow the formatting requirements will not be reviewed.**

### **Format for Original Work**

- Background:** A succinct summary of the literature or theoretical rationale underlying the abstract.  
Example: HIV-Associated Dementia (or AIDS Dementia Complex) is thought to represent a subcortical dementia with...
- Objective:** This section should provide the basic rationale for the research and the hypothesis tested.
- Methods:** This section must include the number of subjects and information about the experimental design.  
Example: Subjects included 20 HIV-seropositive male outpatients who met criteria for HIV-Associated Dementia. All subjects received...
- Results:** This section should include the statistical approach and details of the analysis (including statistical or experimental controls) that support the conclusions. Statements such as “results will be discussed” or “data will be presented” are not acceptable.  
Example: Apathy measures were significantly correlated with basal ganglia hypoperfusion. This is in contrast to...
- Conclusion:** This section should summarize the essential findings and their implications  
Example: Apathy, but not syndromal depression, is associated with subcortical impairments in...

### **Format for Case Report**

**Background:** A succinct summary of the literature or theoretical rationale underlying the abstract.

Case History

**Conclusions:** This section should summarize the essential findings and their implications

### **General Information**

Abstracts will be reviewed by the ANPA Program Committee. The decision of the Committee is final. The on-line submission deadline is: **October 22, 2007**. Instructions for on-line abstract submission will be posted on the ANPA web site: [www.anpaonline.org](http://www.anpaonline.org) beginning **May 1, 2007**. Notifications of acceptance / rejection will be e-mailed in late November. Please register for the meeting when you submit your abstract. On-line registration: [www.anpaonline.org](http://www.anpaonline.org)

### **Young Investigator Awards**

Travel awards will be given to several young investigators who are embarking on promising careers in the clinical neurosciences. These young investigators will be chosen from among the abstract presenters. To qualify for the Young Investigator Award, the applicant must have performed the work described in the abstract while in training. The applicant's training director must provide a letter confirming that the work was performed during training. We do not request letters of reference. The investigator must also provide a curriculum vitae and a statement of between 250 and 1000 words. The statement should describe the submitter's role in the research; training background; interest in neuropsychiatry, behavioral and cognitive neurology, or the clinical neurosciences; and plans for his or her career. The Awards Committee will choose recipients based on the quality of the abstract and, more broadly, the candidate's perceived ability to make a contribution to the field with the encouragement and support provided by the award. Applicants for the Young Investigator Award, like others who submit abstracts, are agreeing to present the work if the abstract is accepted, regardless of whether a Young Investigator Award is granted. Award winners must attend the entire meeting. The Committee's decision is final.

**To apply:** Submit the information listed above to ANPA office. The deadline for receipt of all application materials is October 22, 2007.

### **For more information contact the ANPA office:**

American Neuropsychiatric Association, 700 Ackerman Road, Suite 625, Columbus, Ohio 43202  
Phone: 614-447-2077 Fax: 614-263-4366 E-mail: [anpa@osu.edu](mailto:anpa@osu.edu) Web Site: [www.anpaonline.org](http://www.anpaonline.org)

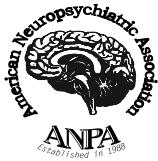

# American Neuropsychiatric Association

## ABOUT ANPA

The American Neuropsychiatric Association (ANPA), established in 1988, is an organization of professionals in neuropsychiatry and the clinical neurosciences. Our mission is to apply neuroscience for the benefit of people. We work together in a collegial fashion to advance knowledge of brain-behavior relations, provide a forum for learning, and promote excellent, scientific and compassionate care.

The strength of the organization is our diversity of membership, which is comprised of professionals in neuropsychiatry, behavioral neurology, neuropsychology, neuroradiology, neuropathology, and neurosurgery as well as the basic neurosciences, who share clinical and/or academic interests in neuropsychiatry. The interdisciplinary nature of the membership encourages collaborations among educators, clinicians, researchers, students and trainees in research presentations, symposia, workshops and/or continuing education courses. Students, fellows and other trainees are encouraged to participate and are offered discount membership and conference fees. The *Journal of Neuropsychiatry and Clinical Neurosciences (JNP)* is the official publication of the organization, and is a benefit of membership.

ANPA holds its annual scientific meeting in the early spring, and provides up to 30 CME / CE credits. Joint meetings with the International Neuropsychological Society, the British Neuropsychiatry Association, and the International Neuropsychiatry Congresses have added an international dimension to the ANPA conferences. Members are encouraged to submit their work for presentation at these annual meetings. Travel awards are available for promising young investigators. Annual meeting abstracts and proceedings are published in *JNP*.

In 1999 the designation of Fellow of the American Neuropsychiatric Association was established in recognition of special achievement in neuropsychiatry, behavioral neurology, neuropsychology or the clinical neurosciences.

In 2001 the ANPA Career Development Award Program was instituted. It recognizes advanced trainees in psychiatry, neurology, or neuropsychology whose accomplishments during training offer promise of a successful career in neuropsychiatry and the clinical neurosciences. The award will support costs associated with participation in two consecutive Annual Meetings, establish an informal mentoring relationship between the awardee and one ANPA Fellow and facilitate the awardee's involvement in ANPA.

ANPA has been actively engaged in efforts toward creation of subspecialty certification for neuropsychiatry including developing a core curriculum and guidelines for training in neuropsychiatry. In March 2004, a joint application from ANPA and the Society for Behavioral and Cognitive Neurology (SBCN) was submitted to the Unified Council for Neurologic Subspecialties (UCNS) for recognition of the Neurological Subspecialty Area (NSA) of Behavioral Neurology & Neuropsychiatry ([www.ucns.org](http://www.ucns.org)). On June 30, 2004 Behavioral Neurology & Neuropsychiatry was approved as a single subspecialty. The first certification exam in Behavioral Neurology & Neuropsychiatry took place in September 2006.

## BENEFITS OF MEMBERSHIP

- **Subscription** to the *Journal of Neuropsychiatry and Clinical Neurosciences (JNP)*
- **Online journal** subscriptions at a reduced price
- **Opportunities** for presentation at the annual meeting with accepted abstracts published in the *JNP*
- Significantly **reduced registration fees** at the annual meeting
- Regular **mailings** including newsletters, information about job opportunities and pertinent information about upcoming meetings
- **Discounted membership fees** for trainees
- **Collaboration** in clinical, educational and research activities and the opportunity to interact with senior colleagues
- Extensive **Bibliography** in Neuropsychiatry
- **Reduced journal subscription rates** from related organizations

## ANPA COMMITTEES

**The Education Committee** The ANPA Education Committee supports efforts related to education and practice of high quality care and research in neuropsychiatry. They have developed a model curriculum and standards for accreditation of neuropsychiatry fellowship programs. The committee has developed and maintains an updated bibliography of neuropsychiatry-relevant references.

**The Membership Committee** recruits new members for ANPA, reviews applications of all potential members, oversees collection of yearly membership dues, reviews Fellow applications and hosts a new member events at the annual ANPA meeting.

**The Research Committee** reviews and publishes articles on research issues in neuropsychiatry. They have developed a Research Registry that can be accessed through the ANPA website. Past projects include position statements on the clinician-scientist in neuropsychiatry, and topical reviews.

**The Scientific Program Committee** plans the ANPA Annual Meeting.

**The Website Committee** The ANPA website is located at [www.anpaonline.org](http://www.anpaonline.org).

### JOIN ANPA NOW!

**You can now join online at: [www.anpaonline.org](http://www.anpaonline.org)**

Candidates should have an interest in the field of clinical neuroscience.

Online: Go to [www.anpaonline.org](http://www.anpaonline.org)

Dues: \$175 regular membership \$70 members in training

#### **More information**

Mail: ANPA, 700 Ackerman Rd., Ste 625, Columbus, OH 43202

Website: [www.anpaonline.org](http://www.anpaonline.org)

Email: [anpa@osu.edu](mailto:anpa@osu.edu)

Phone: 614-447-2077

# Enhance Your DSM Library with These Books!

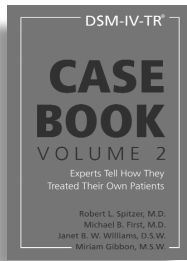

## DSM-IV-TR® Casebook, Volume 2

Experts Tell How They Treated Their Own Patients

Edited by Robert L. Spitzer, M.D., Michael B. First, M.D.,  
Miriam Gibbon, M.S.W., and Janet B. W. Williams, D.S.W.

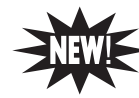

A remarkable 53 contributors, whose cases represent the full range of psychological, psychosocial, and pharmacological treatment approaches, include in their case studies a summary of the patient's presenting symptoms and problems, history of present illness and past history, the expert's differential diagnosis and reasons for choosing a particular therapy, their initial treatment goals, how they explained the treatment to the patient and the patient's reaction, what actually went on in the sessions, the expert's thoughts and feelings during the treatment process, and how the patient changed over time.

2006 • 448 pages • ISBN 978-1-58562-219-1 • Hardcover • \$62.00 • Item #62219 | 2006 • 448 pages • ISBN 978-1-58562-220-7 • Paperback • \$42.00 • Item #62220

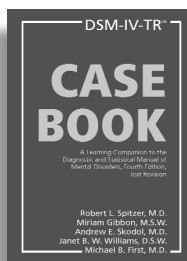

## DSM-IV-TR® Casebook

A Learning Companion to the Diagnostic and Statistical Manual of Mental Disorders, Fourth Edition, Text Revision

Robert L. Spitzer, M.D., Miriam Gibbon, M.S.W., Andrew E. Skodol, M.D.,  
Janet B. W. Williams, D.S.W., and Michael B. First, M.D.

Updated for *DSM-IV-TR*, the *DSM-IV-TR® Casebook* facilitates the transition from the concepts and terminology of *DSM-IV-TR* to actual clinical situations by providing clinical vignettes for illustration and study. It helps both students and clinicians visualize DSM-IV-TR disorders through the use of clinical vignettes. Each is followed by a discussion of the DSM-IV-TR differential diagnosis. The *DSM-IV-TR® Casebook* is highly recommended for clinicians to help them develop a deeper comprehension of all diagnostic categories.

2002 • 592 pages • ISBN 978-1-58562-058-6 • Hardcover • \$84.00 • Item #62058 | 2002 • 592 pages • ISBN 978-1-58562-059-3 • Paperback • \$64.00 • Item #62059

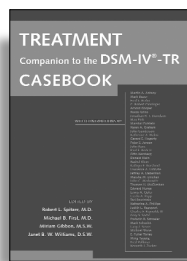

## Treatment Companion to the DSM-IV-TR® Casebook

Edited by Robert L. Spitzer, M.D., Michael B. First, M.D.,  
Miriam Gibbon, M.S.W., and Janet B. W. Williams, D.S.W.

One of the main purposes of psychiatric diagnosis is to guide treatment selection. Although the *DSM-IV-TR® Casebook* discussions often briefly mention treatment and follow-up, the focus is almost exclusively on diagnosis. This *Treatment Companion* takes the next step: for 34 cases (all but three from the *DSM-IV-TR® Casebook*), world-renowned experts discuss their approach to treatment for a case in their specialty area—both how they would manage the specific case and the general principles of treatment for that disorder.

2004 • 352 pages • ISBN 978-1-58562-194-1 • Hardcover • \$67.00 • Item #62194 | 2004 • 352 pages • ISBN 978-1-58562-139-2 • Paperback • \$47.00 • Item #62139

|                                                                                                                                  |                       |
|----------------------------------------------------------------------------------------------------------------------------------|-----------------------|
| <b>SET</b> of Treatment Companion to the DSM-IV-TR® Casebook and DSM-IV-TR® Casebook (hardcover)                                 | Item #5083 • \$128.00 |
| <b>SET</b> of Treatment Companion to the DSM-IV-TR® Casebook and DSM-IV-TR® Casebook (paperback)                                 | Item #5084 • \$94.00  |
| <b>SET</b> of DSM-IV-TR® Casebook and DSM-IV-TR® Casebook, Volume 2 (paperback)                                                  | Item #5097 • \$90.00  |
| <b>SET</b> of DSM-IV-TR® Casebook, DSM-IV-TR® Casebook, Volume 2, and Treatment Companion to the DSM-IV-TR® Casebook (paperback) | Item #5098 • \$130.00 |

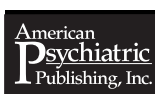

The *First* and *Last* Word in Psychiatry

**Toll-Free: 1-800-368-5777** ■ **Order online: [www.appi.org](http://www.appi.org)**

Please reference priority code AH706 when ordering.

The most trusted and respected name in psychiatric publishing  
brings you

# PsychiatryOnline.com

## Two New Psychopharmacology Resources Recently Added to PsychiatryOnline.com!

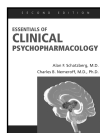

### Essentials of Clinical Psychopharmacology, Second Edition

Edited by Alan F. Schatzberg, M.D., and Charles B. Nemeroff, M.D., Ph.D.

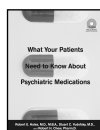

### What Your Patients Need to Know About Psychiatric Medications

Robert E. Hales, M.D., M.B.A.,  
Stuart C. Yudofsky, M.D., and  
Robert H. Chew, Pharm.D.

**PsychiatryOnline.com** is a powerful website that features *DSM-IV-TR*<sup>®</sup> and *The American Journal of Psychiatry* as the cornerstones of an unsurpassed collection of psychiatric references, including books, journals, and self-assessment tools. Much more than simply books and journals presented online, **PsychiatryOnline.com** features sophisticated searching and indexing tools that enable you to quickly target all the information you need.

Whether your needs are clinical, learning, or research, **PsychiatryOnline.com** provides access to the information critical to your work and everyday practice with convenient features such as:

- Search and linking tools that let you find relevant book chapters and journal articles quickly.
- Unlimited downloads to PDA so you can take book sections with you wherever you go.
- Copy and paste functions for easy creation of tables and presentations.
- Citation exports to most reference manager formats.
- Printer-friendly views that mean no reformatting when you need a hard copy.
- Saved searches and bookmarked chapters to make it easy to return to topics of interest.
- Email page feature that allows you to share the information with colleagues.

### Other subscriber benefits include:

- Book of the Month—You'll get access each month to a FREE PDF version of a featured book from American Psychiatric Publishing, Inc.
- The most up-to-date versions available including NEW *American Psychiatric Association Practice Guidelines* as they are released.
- PLUS Guideline Watches and DSM-IV-TR Coding Updates, as soon as they are available.

Subscribe TODAY before subscription rates increase!  
Visit **www.PsychiatryOnline.com**.  
Please enter priority code AH735 when completing your request.

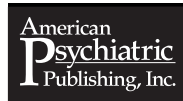

The First and Last Word in Psychiatry

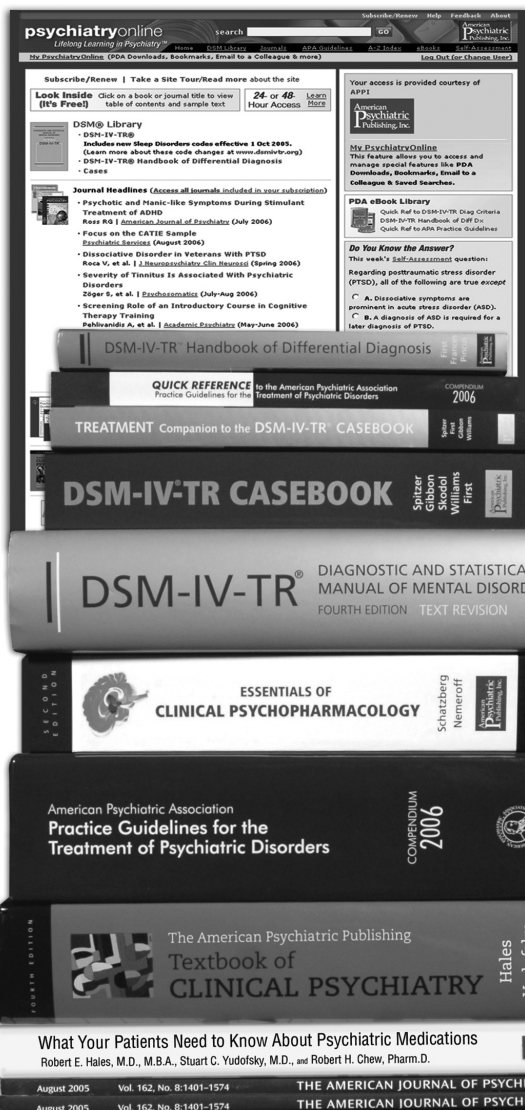

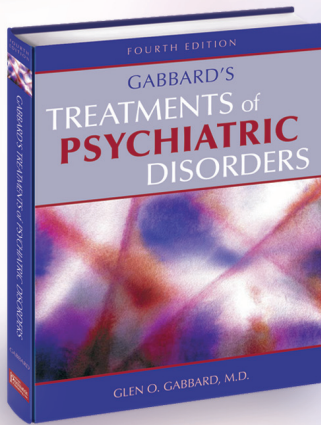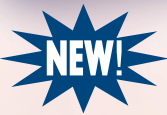

# Gabbard's Treatments of Psychiatric Disorders, Fourth Edition

Edited by Glen O. Gabbard, M.D.

First published in 1989 and already a staple of psychiatric practice through three editions, this book has been thoroughly revised to reflect modern clinical expertise in a more accessible volume. More than 160 authorities share insights gained from firsthand experience in a state-of-the-art text that covers all major treatments in psychiatry linked to specific disorders, with a pluralistic approach that includes all major treatment modalities without focusing exclusively on favorite approaches. Not only has each chapter been completely updated, the text has been reorganized to facilitate its publication in a single volume that cuts directly to the heart of disorder-based treatments.

Scrupulously reviewed to consolidate treatment information most needed by readers, the book is organized along the lines of DSM-IV-TR to cover the entire spectrum of conditions:

disorders of childhood; cognitive disorders; substance-related disorders; psychotic disorders; mood disorders; anxiety, dissociative, and adjustment disorders; somatoform and factitious disorders; eating disorders; personality disorders; sleep disorders; and disorders of impulse control.

Empirically validated treatments for each disorder are summarized; where empirical data are lacking, the contributors' clinical wisdom is brought to bear to advise the reader how to approach a particular condition.

2007 ■ 1,056 pages  
ISBN 978-1-58562-216-0  
Hardcover ■ \$243.95

American  
**Psychiatric**  
Publishing, Inc.

The First and Last Word in Psychiatry

## This fourth edition features a number of significant enhancements.

- Coverage of dementia has been expanded to reflect the disorder's increasing incidence, especially in Alzheimer's disease and cerebrovascular illness.
- Material on substance abuse disorders is organized so that problems with individual drugs and certain common treatment modalities are given separate chapters, with sections within each chapter written by separate authors who are experts on that particular topic.
- The chapters on personality disorders reflect important recent advances: longitudinal research showing that such disorders undergo substantial improvements; the growing recognition that personality disorders have significant genetic determination; and the manualization of psychoanalytic psychotherapy to permit testing and replication.
- Coverage of schizophrenia reflects research of the past decade demonstrating the importance of the cognitive characteristics and sequelae of the illness and outlining the domains and molecular targets of intervention.
- The section on eating disorders has been streamlined to four chapters covering intensive treatments, psychopharmacological treatment, evidence-based and innovative psychological treatments, and family and marital therapy.

*Gabbard's Treatments of Psychiatric Disorders* is an essential touchstone for practitioners and an outstanding reference for students in the mental health professions. Particular care in streamlining its revision has helped make this fourth edition an even more useful clinical tool for day-to-day practice.

To order call Toll Free: 1-800-368-5777, Mon.-Fri., 9 am to 5:30 pm, ET or visit our website at [www.appi.org](http://www.appi.org)

Please reference priority code AH737 when ordering.
