# THE JOURNAL OF NEUROPSYCHIATRY and Clinical Neurosciences

The Official Journal of the American Neuropsychiatric Association

## In this issue:

- Neuropsychiatric Complications of Traumatic Brain Injury: A Critical Review of the Literature (A Report by the ANPA Committee on Research)
- Brain Response Correlates of Decisional Capacity in Schizophrenia: A Preliminary fMRI Study
- Neurological Soft Signs in Schizophrenia Patients With Obsessive-Compulsive Disorder
- HIV Proviral DNA Associated With Decreased Neuropsychological Function

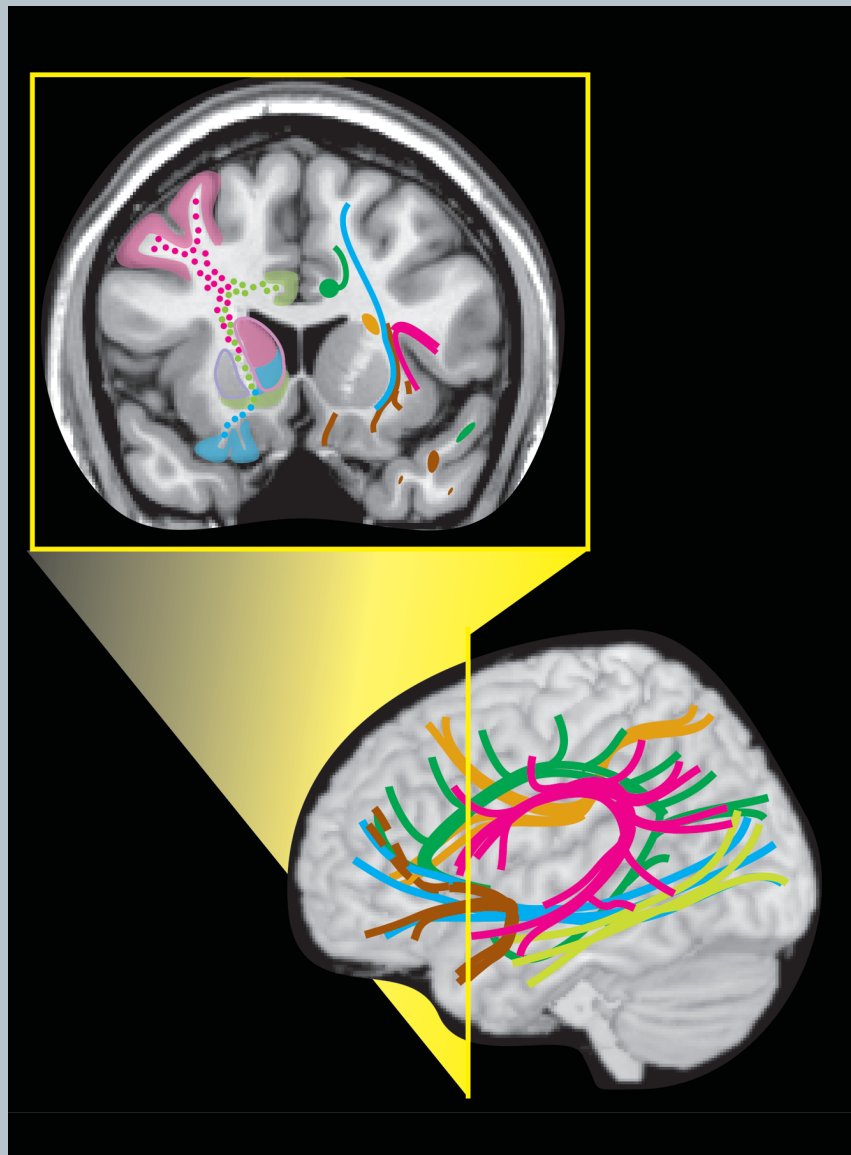

Source: https://psychiatryonline.org/doi/suppl/10.1176/jnp.2007.19.issue-2/suppl_file/cover.pdf
