# THE JOURNAL OF NEUROPSYCHIATRY and Clinical Neurosciences

The Official Journal of the American Neuropsychiatric Association

## In this issue:

- Neuropsychiatric Complications of Traumatic Brain Injury: A Critical Review of the Literature (A Report by the ANPA Committee on Research)
- Brain Response Correlates of Decisional Capacity in Schizophrenia: A Preliminary fMRI Study
- Neurological Soft Signs in Schizophrenia Patients With Obsessive-Compulsive Disorder
- HIV Proviral DNA Associated With Decreased Neuropsychological Function

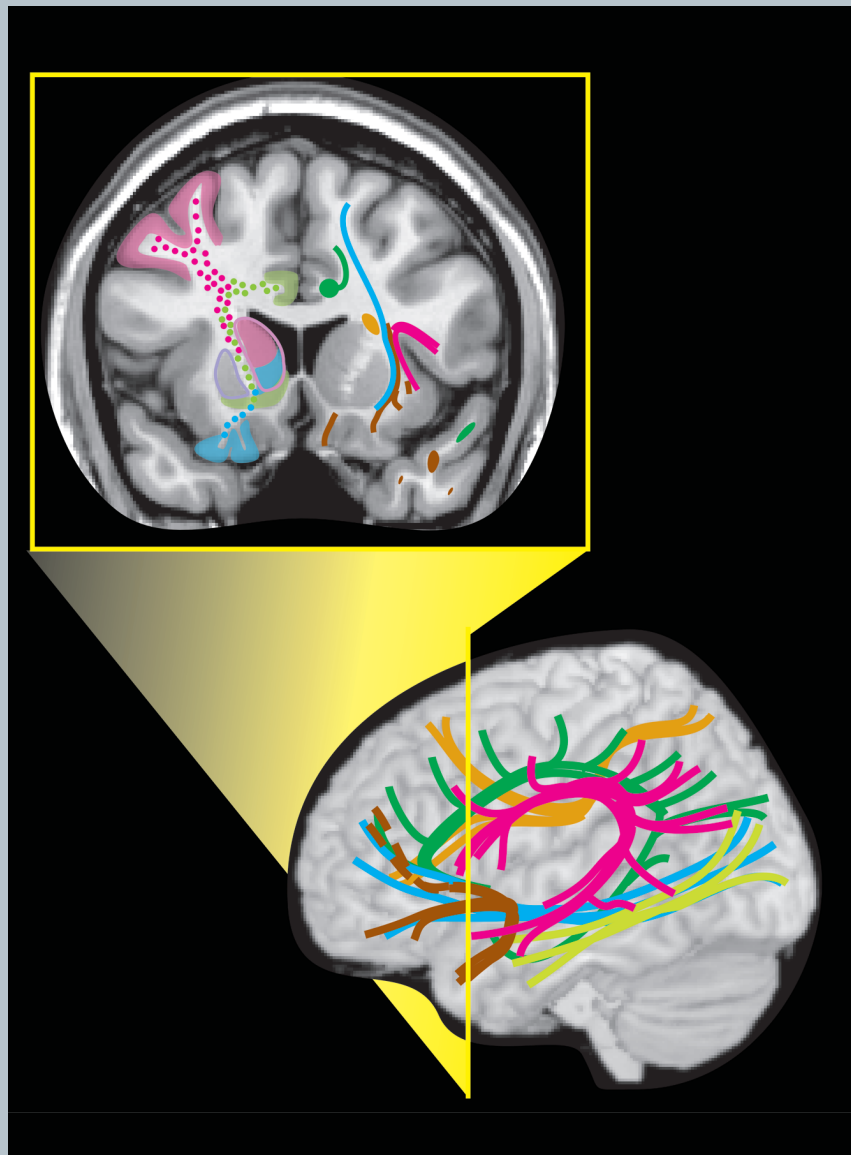

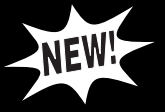

# Key Psychiatric Resources

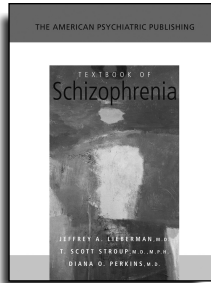

## The American Psychiatric Publishing Textbook of Schizophrenia

Edited by Jeffrey A. Lieberman, M.D.,  
T. Scott Stroup, M.D., M.P.H., and  
Diana O. Perkins, M.D., M.P.H.

Experts from North America and Europe address the complexity of schizophrenia in a comprehensive volume that leads readers from historical overview and epidemiology to consideration of comorbid conditions. It covers genetic and environmental causes, describes leading theories of schizophrenia, and explores the involvement of abnormal brain circuitry and the results of the latest neuroimaging studies.

2006 • 464 pages • ISBN 1-58562-191-9 • Hardcover • \$100.00  
Item #62191

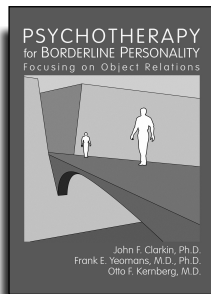

## Psychotherapy for Borderline Personality

Focusing on Object Relations

John F. Clarkin, Ph.D.,  
Frank E. Yeomans, M.D., Ph.D, and  
Otto F. Kernberg, M.D.

*Psychotherapy for Borderline Personality* describes principles of Transference-Focused Psychotherapy (TFP) intervention and contains a wealth of practical guidelines on how to apply TFP to individual patients on a session-by-session basis. This groundbreaking treatment manual focuses on the tasks of the therapist and the sequence of responses by the patient for each phase of treatment. Recognizing that patients with borderline personality organization (BPO) start treatment at different points of their pathology, the authors provide an expansive description of the treatment course with high-level and low-level BPO patients, making the book relevant to a wide range of clinical situations.

2006 • 416 pages • ISBN 1-58562-210-9 • Hardcover • \$60.00  
Item #62210

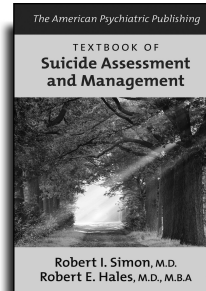

## The American Psychiatric Publishing Textbook of Suicide Assessment and Management

Edited by Robert I. Simon, M.D., and  
Robert E. Hales, M.D., M.B.A.

“Dr. Robert I. Simon has done it again! He has joined with Dr. Robert E. Hales to provide us with a most comprehensive textbook. The authors of the various chapters are some of the finest clinicians and writers on suicide. This is a very readable and complete textbook that has both breadth and depth with respect to the subject of suicide. It is a welcome addition to every psychiatrist’s library.”

— Robert L. Sadoff, M.D., Director, Center for Studies in Legal Psychiatry, University of Pennsylvania School of Medicine, Philadelphia, Pennsylvania

2006 • 688 pages • ISBN 1-58562-213-3 • Hardcover • \$89.00  
Item #62213

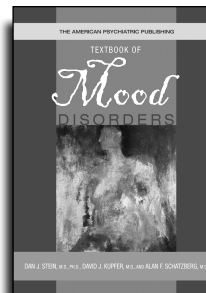

## The American Psychiatric Publishing Textbook of Mood Disorders

Edited by Dan J. Stein, M.D., Ph.D.,  
David J. Kupfer, M.D., and  
Alan F. Schatzberg, M.D.

Psychiatrists and other mental health care and medical professionals can now turn to a truly authoritative, up-to-date reference for current information about mood disorders. *The American Psychiatric Publishing Textbook of Mood Disorders* presents the state of the art in diagnosis, psychobiology, pharmacotherapy, and psychotherapy across the vast spectrum of mood disorders, from historical perspectives, rating scales and cultural, gender, and age differences, to neurochemistry and cutting-edge treatments in augmentation strategies and brain stimulation.

2006 • 792 pages • ISBN 1-58562-151-X • Hardcover • \$124.00  
Item #62151

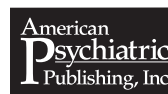

The *First* and *Last* Word in Psychiatry  
1000 Wilson Boulevard  
Suite 1825, Arlington, VA 22209-3901  
Phone: 703-907-7322 or 1-800-368-5777  
Mon.-Fri., 9 am to 5:30 pm, ET  
Fax: 703-907-1091 | Email: [appi@psych.org](mailto:appi@psych.org)  
[www.appi.org](http://www.appi.org)

Please reference priority code AH728 when ordering.
